# Supplementary material
Source: PubMed Central journal article supplement (PMC6693840)

A.

pAAV9-sCB-IR

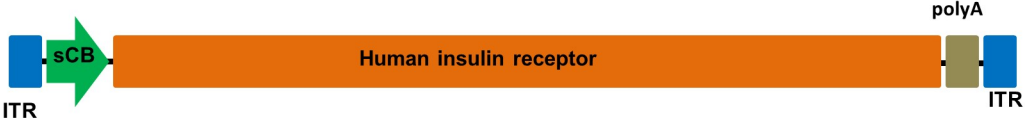

B.

pAAV9-sCB control

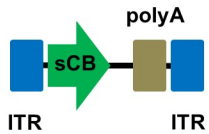

**A.**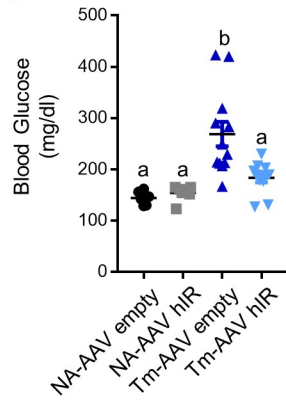**B.**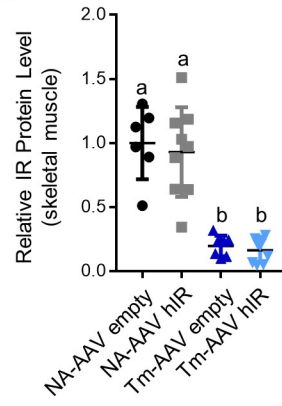**C.**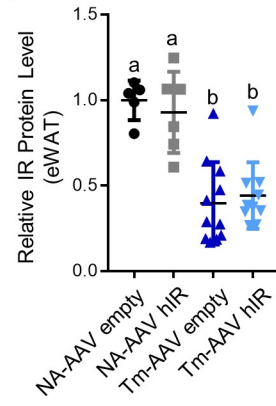

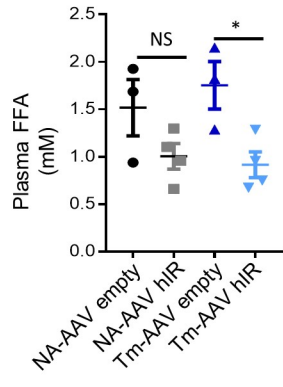

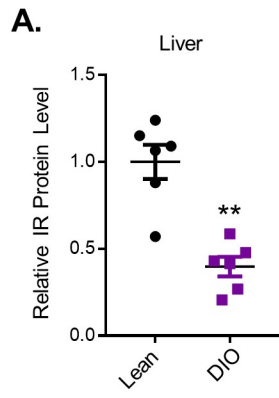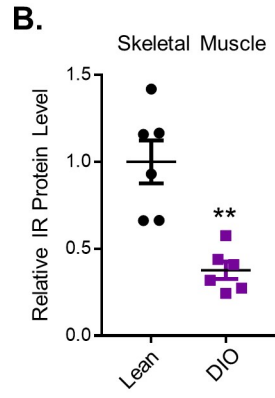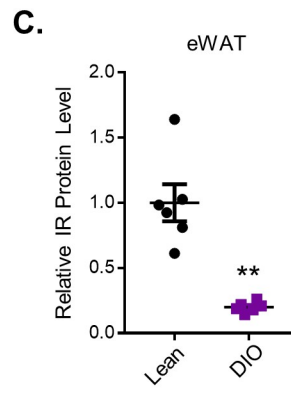

**A.**

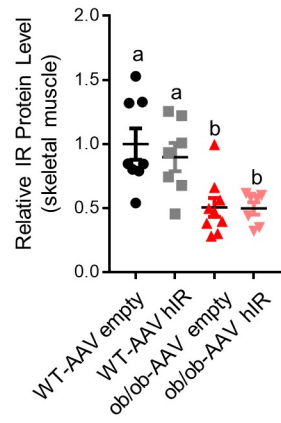

**B.**

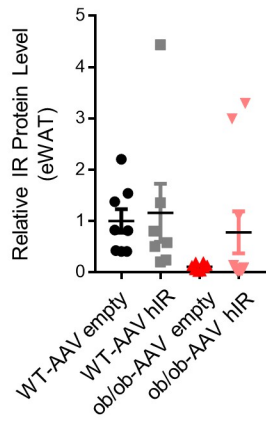

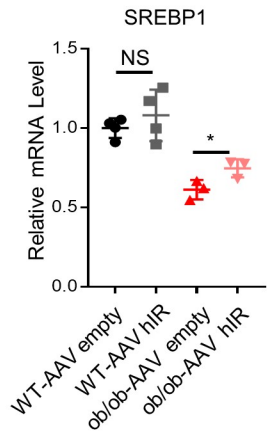

Supplement: jciinsight-4-124945-s047.pdf [file jciinsight-4-124945-s047.pdf]
